# Supplementary material
Source: publisher figshare collection journal article supplement (https://diabetesjournals.figshare.com/articles/dataset/_/28351403)
Supplement: Supplementary file 1 [file 1]

## Sheet: Sheet1
Gene Symbol	Forward Seqencing	Reverse Seqencing
Lrtm1	GAGTCCTCAGGCCGGGATA	GACCAGCAGCAGAGTACCTTT
Lrtm2	TGCGGAGAGTGTGGGTTTC	GCAATCCAGCAGGTGATCCA
Myh1	CCCTAAAGGCAGGCTCTCTCAC	TGAGCCTCGATTCGCTCCTTT
Myh2	TCACATCCAACAAGAAGCCAGAGC	CCCTGGCTGACAAATGGGTAATCA
Myh4	AGTCCCAGGTCAACAAGCTG	TTTCTCCTGTCACCTCTCAACA
Myh7	CTCCACTTCCTCACGTACCCAA	GGAGCCACCTACAACACAACA
DAT	GGTGCTGATTGCCTTCTCCAGT	GACAACGAAGCCAGAGGAGAAG
TH	TGCACACAGTACATCCGTCATGC	GCAAATGTGCGGTCAGCCAACA
Arppp0	GAAACTGCTGCCTCACATCCG	GCTGGCACAGTGACCTCACACG
