# Supplementary material
Source: publisher figshare collection journal article supplement (https://diabetesjournals.figshare.com/articles/dataset/_/28351403)
Supplement: Supplementary file 1 [file 1]

## **Supplemental Materials**

### **Lrtm1 - A Novel Sensor of Insulin Signaling and Regulator of Metabolism and Activity**

Yingying Yu<sup>1</sup>†, Guoxiao Wang<sup>1</sup>†, Wenqiang Chen<sup>1</sup>, Xiangyu Liu<sup>1</sup>, Vitor Rosetto Munoz<sup>1</sup>,

Weikang Cai<sup>1,2</sup>, Antonio S. Gomes<sup>1</sup>, C. Ronald Kahn<sup>1\*</sup>

† Co-first authors

#### **\*Corresponding author:**

C. Ronald Kahn, M.D.

Joslin Diabetes Center

One Joslin Place, Boston, MA 02215

Phone: (617) 309-2635

Fax: (617) 309-2487

Email: [C.Ronald.Kahn@joslin.harvard.edu](mailto:C.Ronald.Kahn@joslin.harvard.edu)

**Fig. S1** *Lrtm1*, enriched in metabolic tissues, responds to the change of insulin signaling

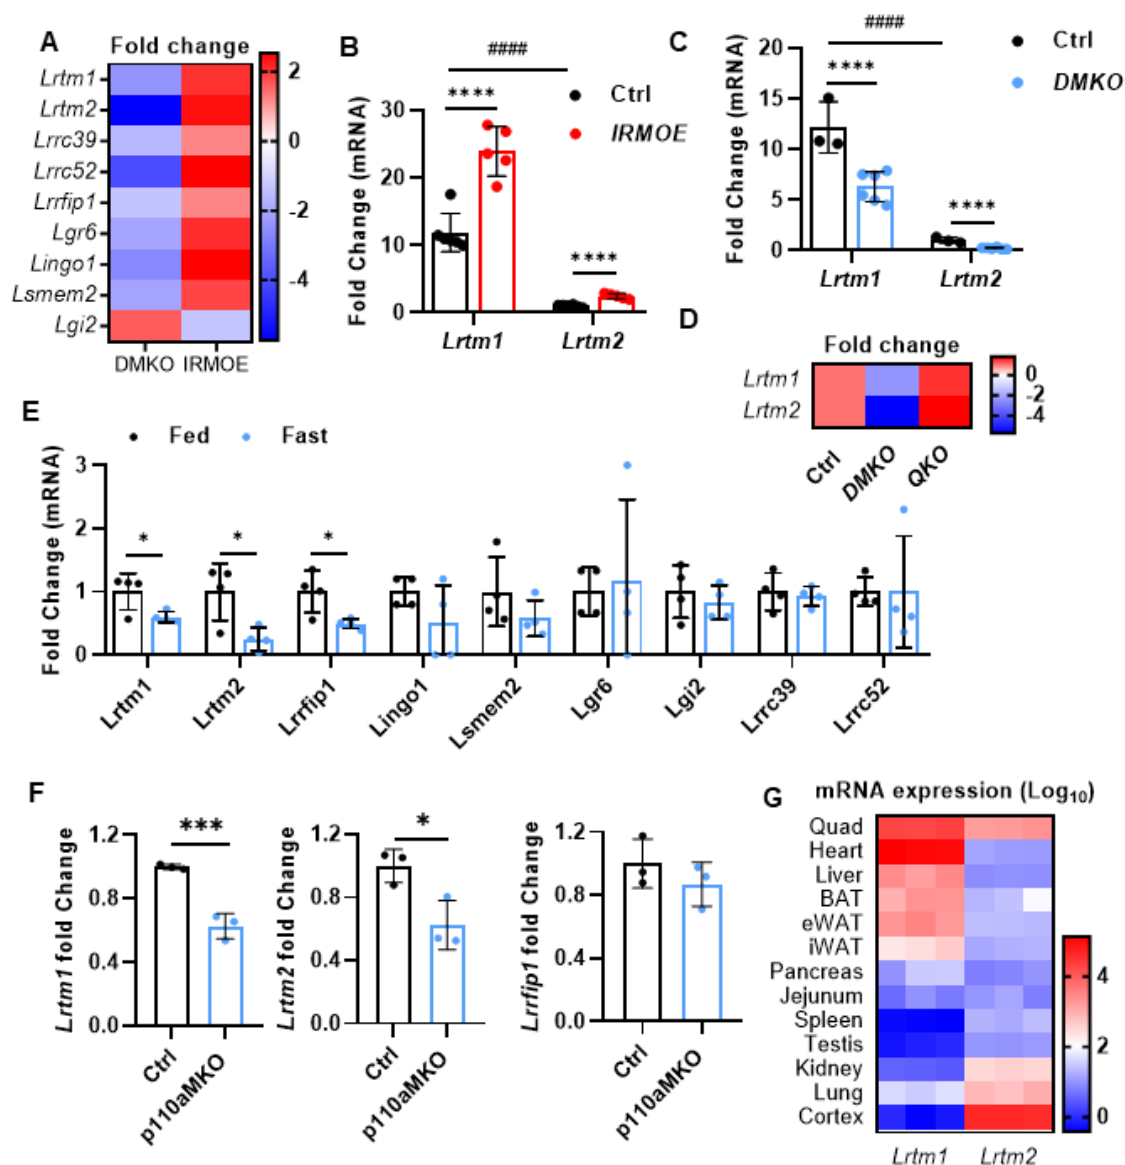

A: Heatmap illustrating the fold-change of differentially expressed genes of the leucine-rich repeat (LRR) family, derived from RNA sequencing results of skeletal muscle in *InsR/IGF1R* muscle-specific double knockout mice (*DMKO*) and *InsR* muscle-specific overexpression mice (*IRMOE*), compared to their respective control groups (Ctrl). B: Dot blots displaying the fold-change of *Lrtm1* and *Lrtm2* from skeletal muscle mRNA sequencing in Ctrl and *IR* muscle-specific overexpression (*IRMOE*) mice, normalized to the relative expression of *Lrtm2* in Ctrl mice. C: Dot blots showing fold-change of *Lrtm1* and *Lrtm2* from skeletal muscle sequencing in Ctrl and *DMKO* mice, normalized to the *Lrtm2*'s relative expression in Ctrl mice. D: Heatmap illustrating the fold-change of *Lrtm1* and *Lrtm2* based on RNA sequencing of skeletal muscle in Ctrl, *InsR/IGF1R* muscle-specific double knockout (*DMKO*), and *InsR/IGF1R/Foxo1, 3, 4* quintet knockout (*QKO*) mice. E: Dot blots showing fold change of genes in LRR family from skeletal muscle mRNA sequencing in random fed and 24hr-fast mice. F: Dot blots showing fold change of *Lrtm1*, *Lrtm2*, and *Lrrfip1* from skeletal muscle mRNA in Ctrl and *p110α* muscle. G: Heatmap showing mRNA expression (Log<sub>10</sub>) of *Lrtm1* and *Lrtm2* across various tissues: Quad, Heart, Liver, BAT, eWAT, iWAT, Pancreas, Jejunum, Spleen, Testis, Kidney, Lung, and Cortex.

specific knockout mice (*p110αMKO*). G: Heatmap showing q-PCR analysis results of *Lrtm1* and *Lrtm2* mRNA expression ( $\text{Log}_{10}$ ) in different tissues. All the data are from male mice and presented as mean  $\pm$  SD, student *t* test, \**P* < 0.05, \*\*\**P* < 0.005, \*\*\*\**P* < 0.001.

Fig. S2 Effects of *Lrmt1* whole body knockout on tissue weight and muscle fiber type

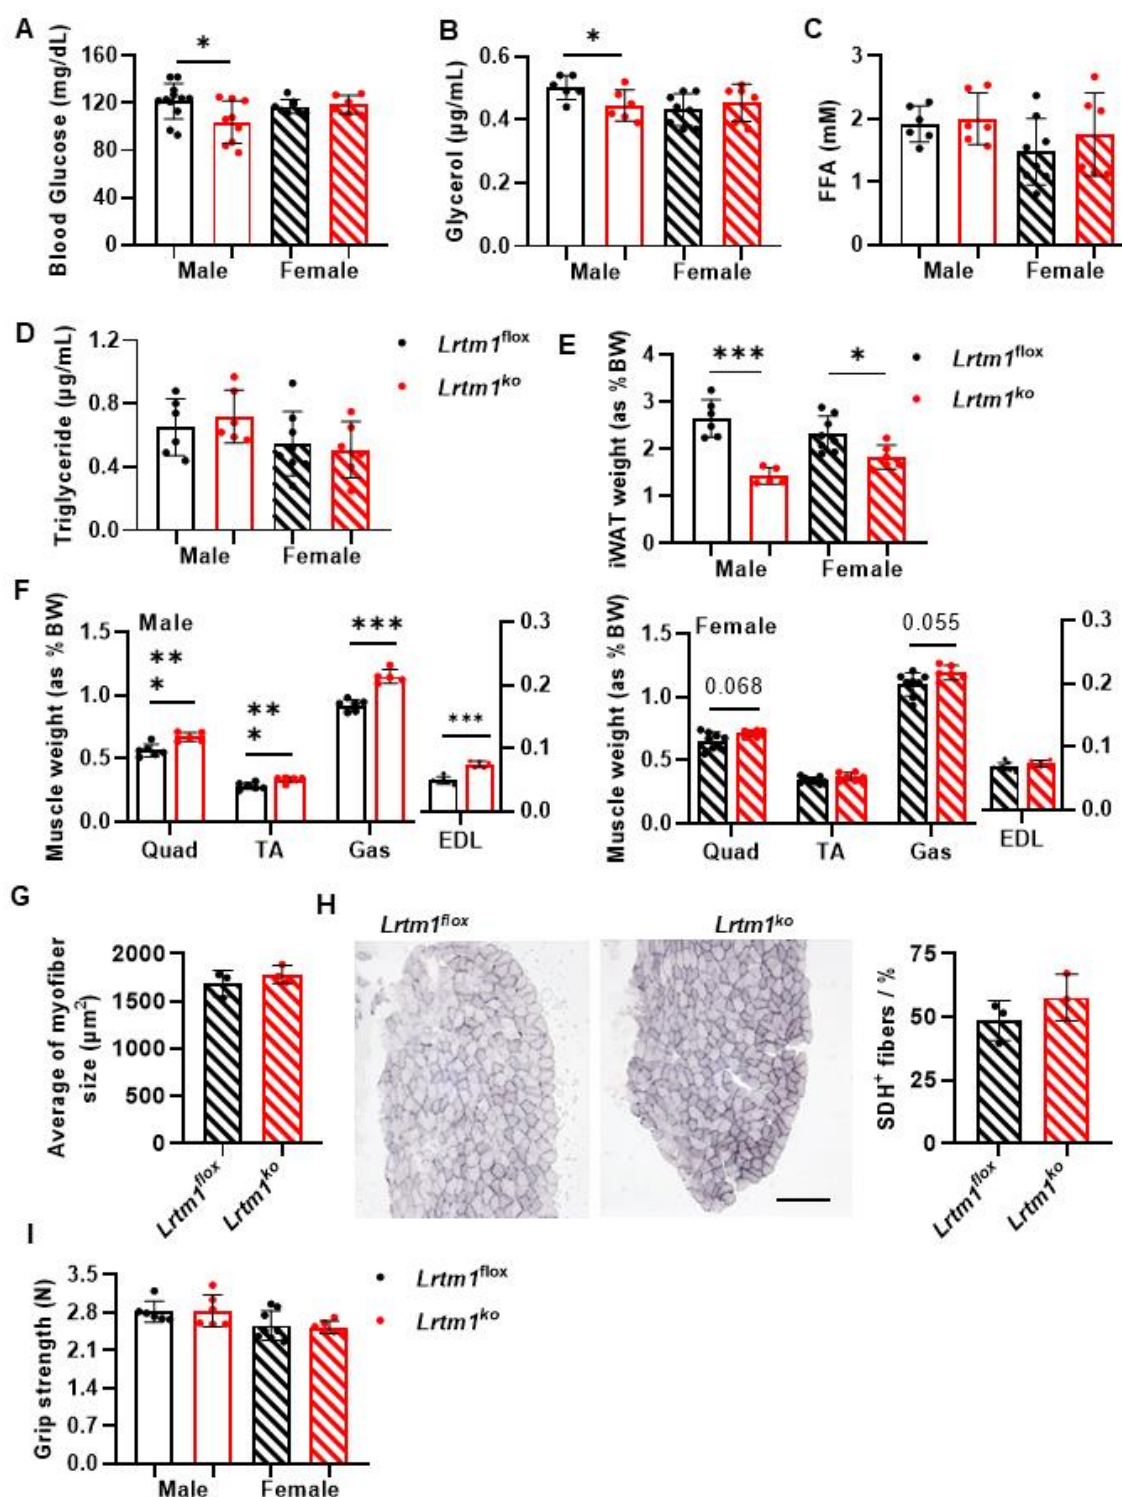

A: Overnight fasting blood glucose level of 4-month-old control and *Lrmt1*<sup>ko</sup> mice, (*n* = 6-12). B, C, D: Plasma glycerol, free fatty acid, and triglyceride levels in overnight fasted control and *Lrmt1*<sup>ko</sup> mice at around 4-month-old age, (*n* = 6-9). E: Inguinal adipose tissue (iWAT) weight from 6-month-

old control and *Lrtm1<sup>ko</sup>* mice normalized by body weight, ( $n = 5-8$ ). *F*: Weight of different skeletal muscles from 6-month-old control and *Lrtm1<sup>ko</sup>* mice normalized by body weight, ( $n = 5-8$ ). *G*: Quantification of muscle fiber size as shown in Fig.1I,  $n > 50$  fibers per mice, three to four mice per group were quantitated, ( $n = 3-4$ ). *H*: SDH staining and quantification of the percentage of SDH highly positive myofibers in soleus muscle from 6-month-old female control and *Lrtm1<sup>ko</sup>* mice, scale bar=200  $\mu\text{m}$ , ( $n = 3$ ). *I*: Grip strength in 4-month-old control and *Lrtm1<sup>ko</sup>* mice, ( $n = 5-8$ ). Data from male mice shown in open bar and data from female mice shown in striped bar. Data represent mean  $\pm$  SD, student *t* test,  $*P < 0.05$ ,  $**P < 0.01$ ,  $***P < 0.005$ .

**Fig. S3 *Lrtm1* whole body deficiency increases food intake and energy expenditure**

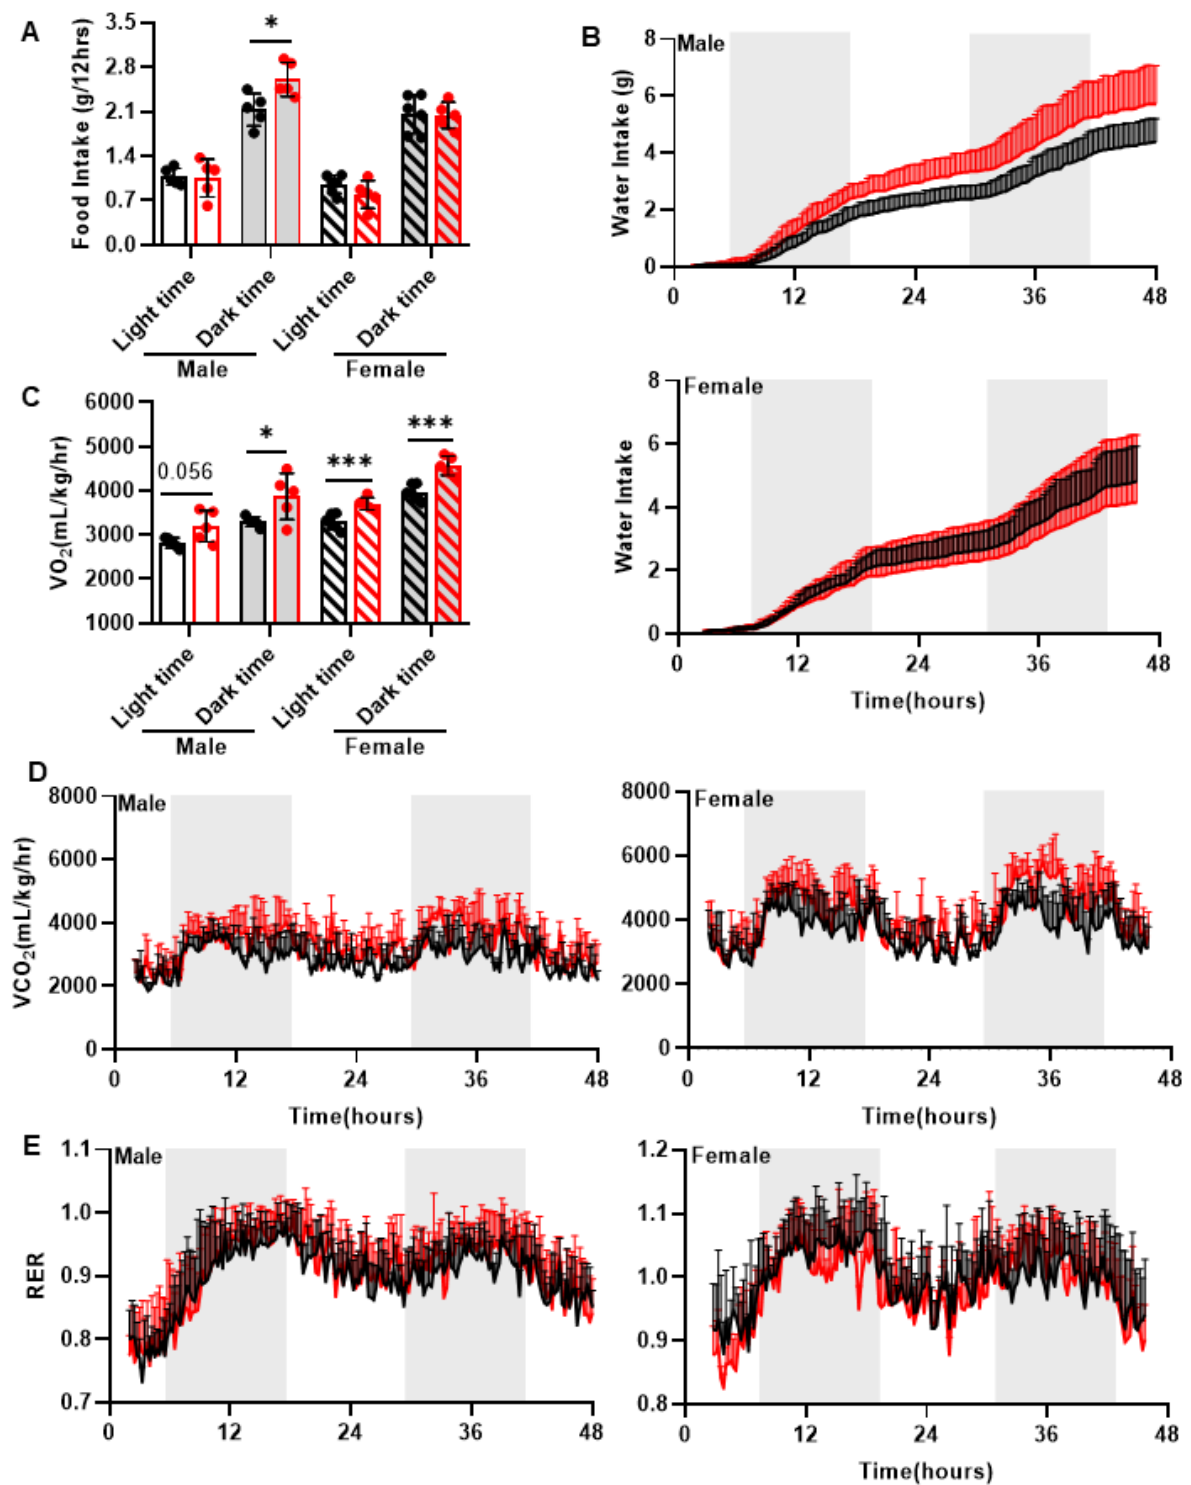

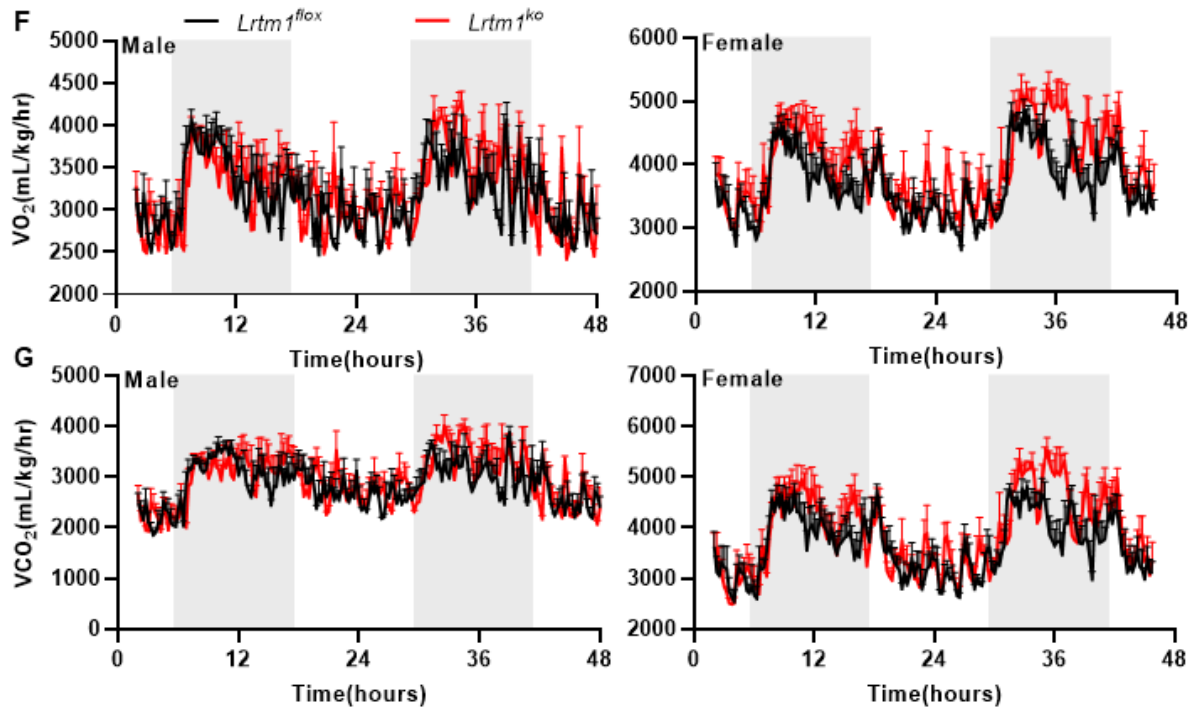

A: Average food intake, B: Cumulative water intake, C: Average  $O_2$  consumption rate (normalized by body weight), D:  $CO_2$  production rate (normalized by body weight), E: Respiratory exchange ratio, F:  $O_2$  consumption raw data, and G:  $CO_2$  production raw data in 5-month-old control and  $Lrtm1^{ko}$  mice fed chow diet with 12h light and dark cycle (gray background) for two days, ( $n = 5-6$ ). Data from male mice shown in open bar and data from female mice shown in striped bar. Data represent mean  $\pm$  SD, student  $t$  test, \* $P < 0.05$ , \*\* $P < 0.01$ , \*\*\* $P < 0.005$ .

**Fig.S4 *Lrtm1* affects insulin action in female mice**

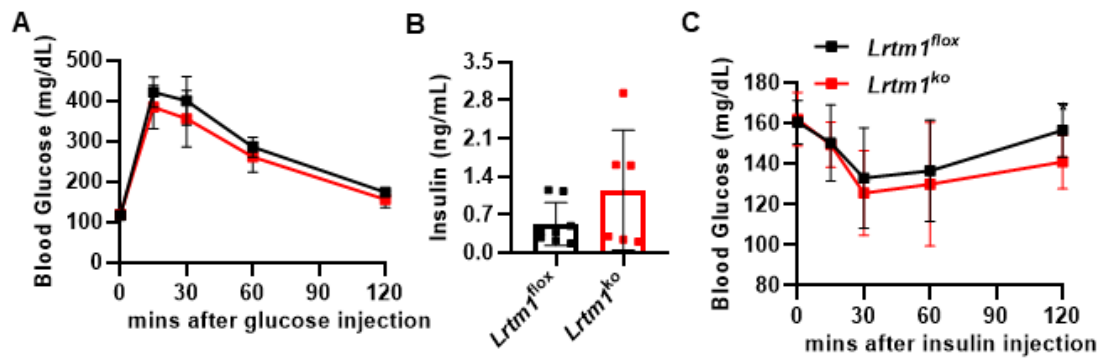

A: IP glucose tolerance tests in 4-month-old control and *Lrtm1*<sup>ko</sup> female mice on chow diet, ( $n = 6-7$ ). B: Plasma insulin levels after overnight fast in 4-month-old control and *Lrtm1*<sup>ko</sup> female mice on chow diet, ( $n = 6-8$ ). C: I.P. Insulin tolerance tests in 5-month-old control and *Lrtm1*<sup>ko</sup> female mice on chow diet, ( $n = 6-7$ ). Data represent mean  $\pm$  SD, student  $t$  test,  $*P < 0.05$ .



Fig. S5 Tissue weight and metabolic phenotype in *Lrtm1* deficient mice on HFD

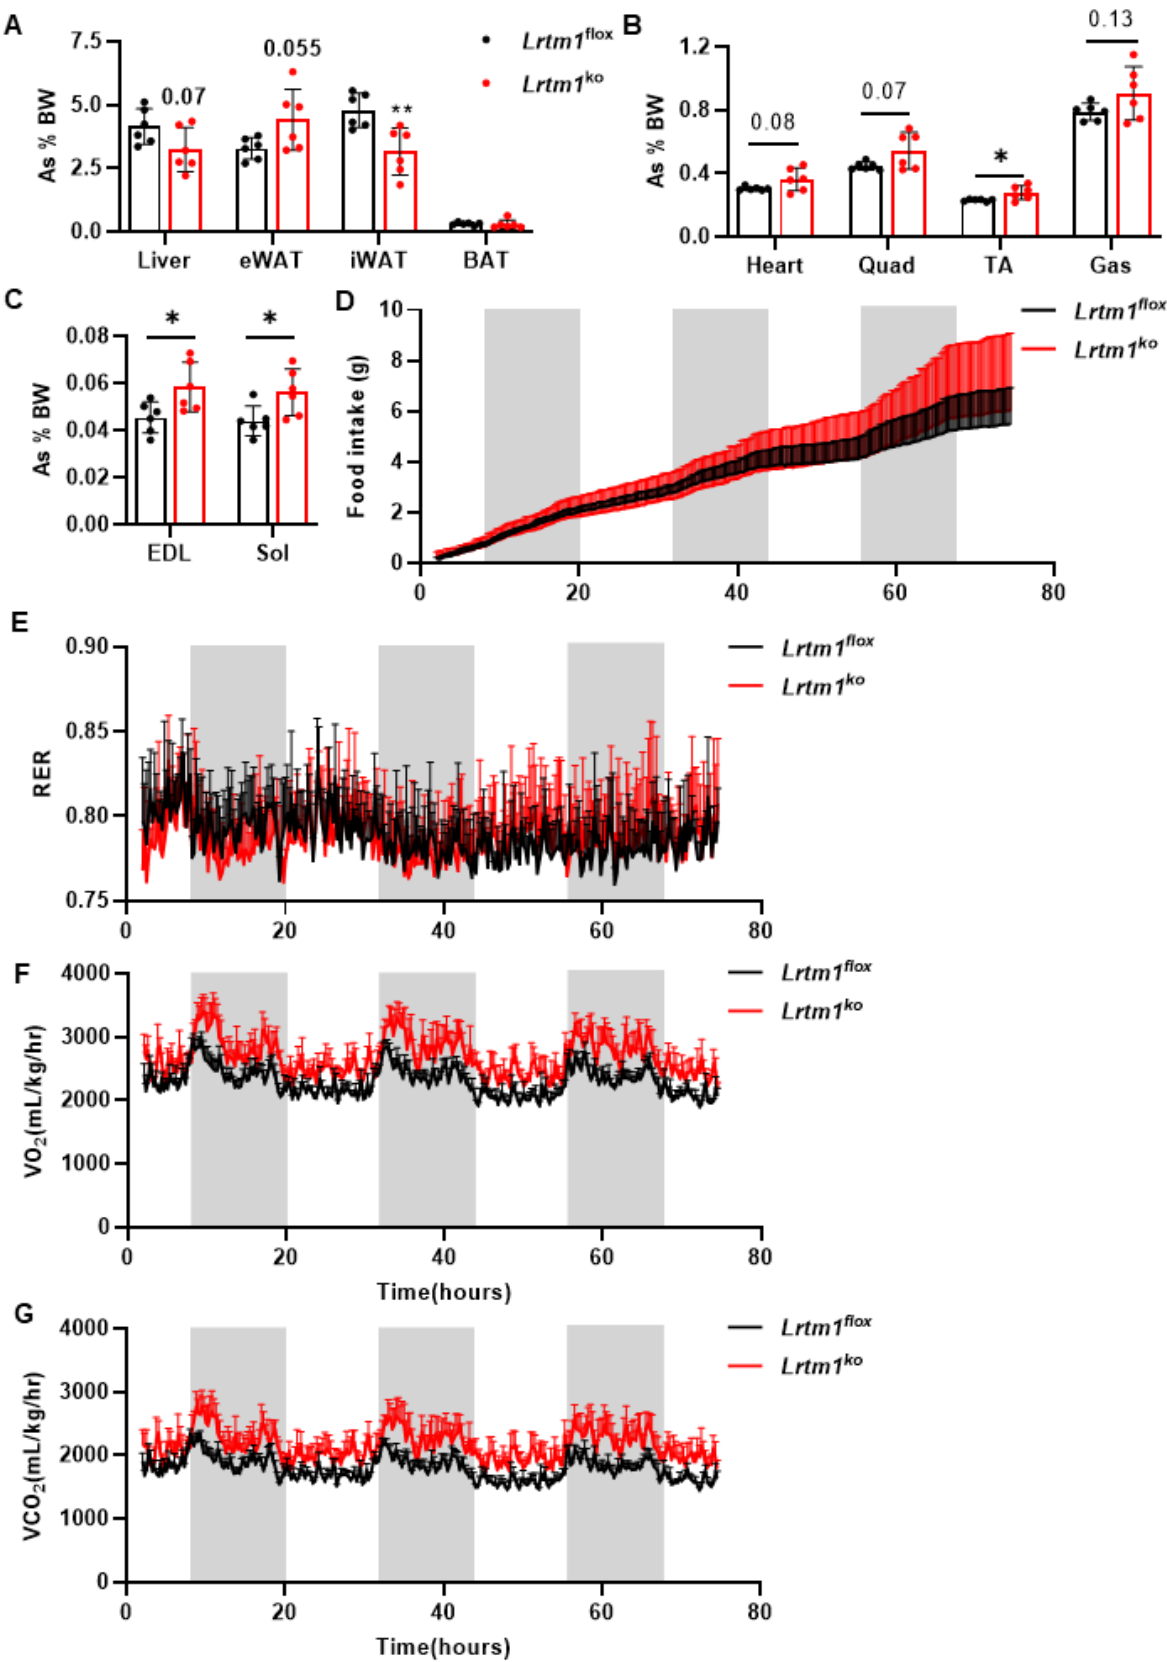

*A, B, C*: Weight of different tissues normalized to body weight in control and *Lrtm1<sup>ko</sup>* male mice on HFD for 15 weeks, (*n* = 5-6). *D, E*: Cumulative food intake and respiratory exchange ratio, and *F*: O<sub>2</sub> consumption raw data, and *G*: CO<sub>2</sub> production raw data in control and *Lrtm1<sup>ko</sup>* male mice on HFD for 13 weeks, (*n* = 5-6). Data represent mean ± SD, student *t* test, \**P* < 0.05, \*\**P* < 0.01.

**Fig. S6 *Lrtm1* whole body deficiency alters behavior activity**

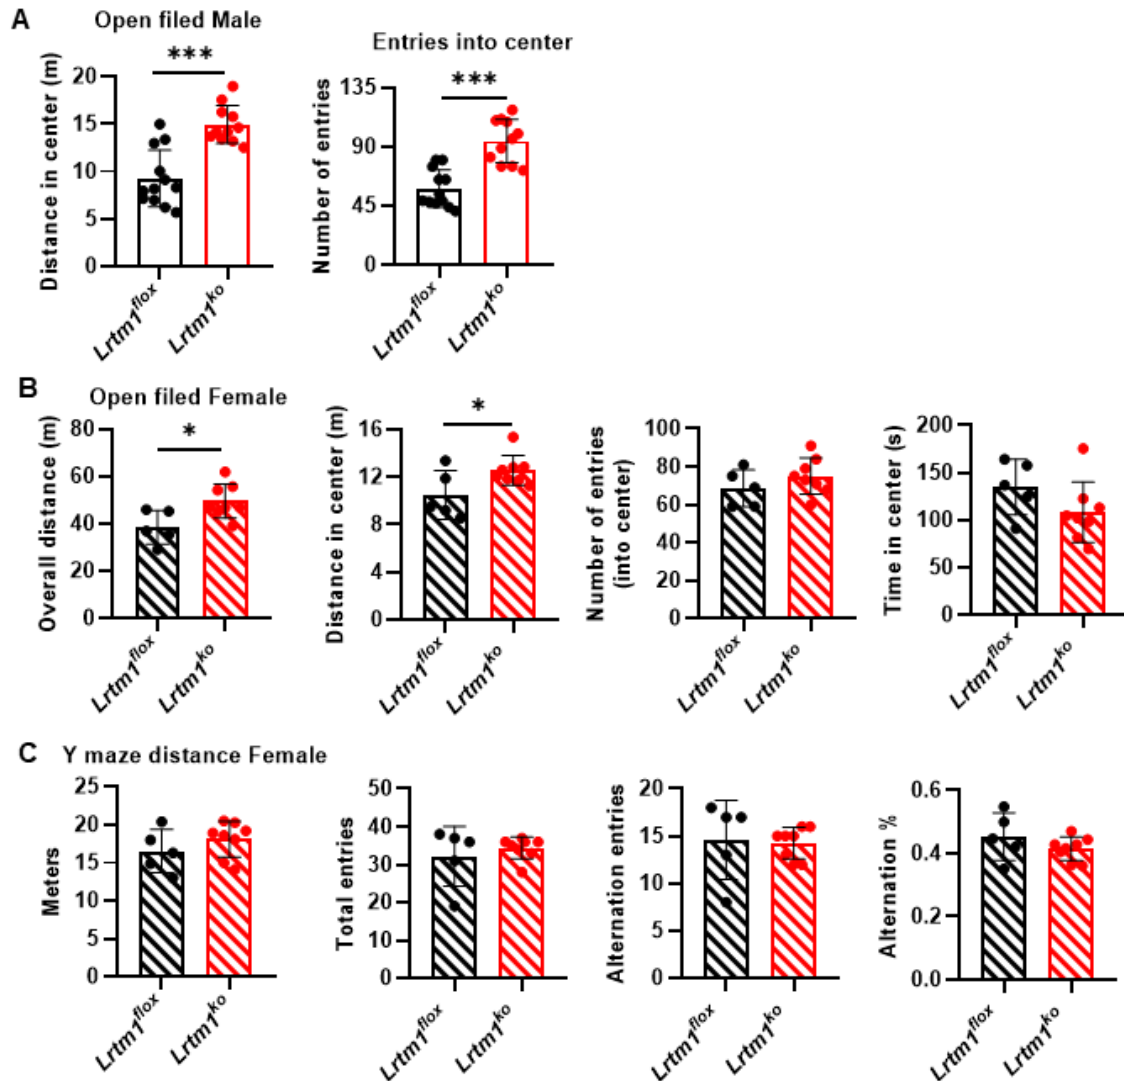

A: The overall distance and entries in center of 11-13-week-old control and *Lrtm1<sup>ko</sup>* male mice measured by open field test for 10 mins, ( $n = 11-12$ ). B: The overall distance travelled, distance travelled while in the center, number of entries into center, and time in center of 11-13-week-old female mice monitored by open field test for 10 mins. C: Total distance, total entries, alternation of entries, and alternation ratio to different arms of 14-16-week-old control and *Lrtm1<sup>ko</sup>* female mice in Y maze for 5 mins. Data represent mean  $\pm$  SD, student  $t$  test, \* $P < 0.05$ , \*\* $P < 0.01$ , \*\*\* $P < 0.005$ .

**Fig. S7 *Lrtm1* skeletal muscle deficiency has no effect on water intake and RER in male mice**

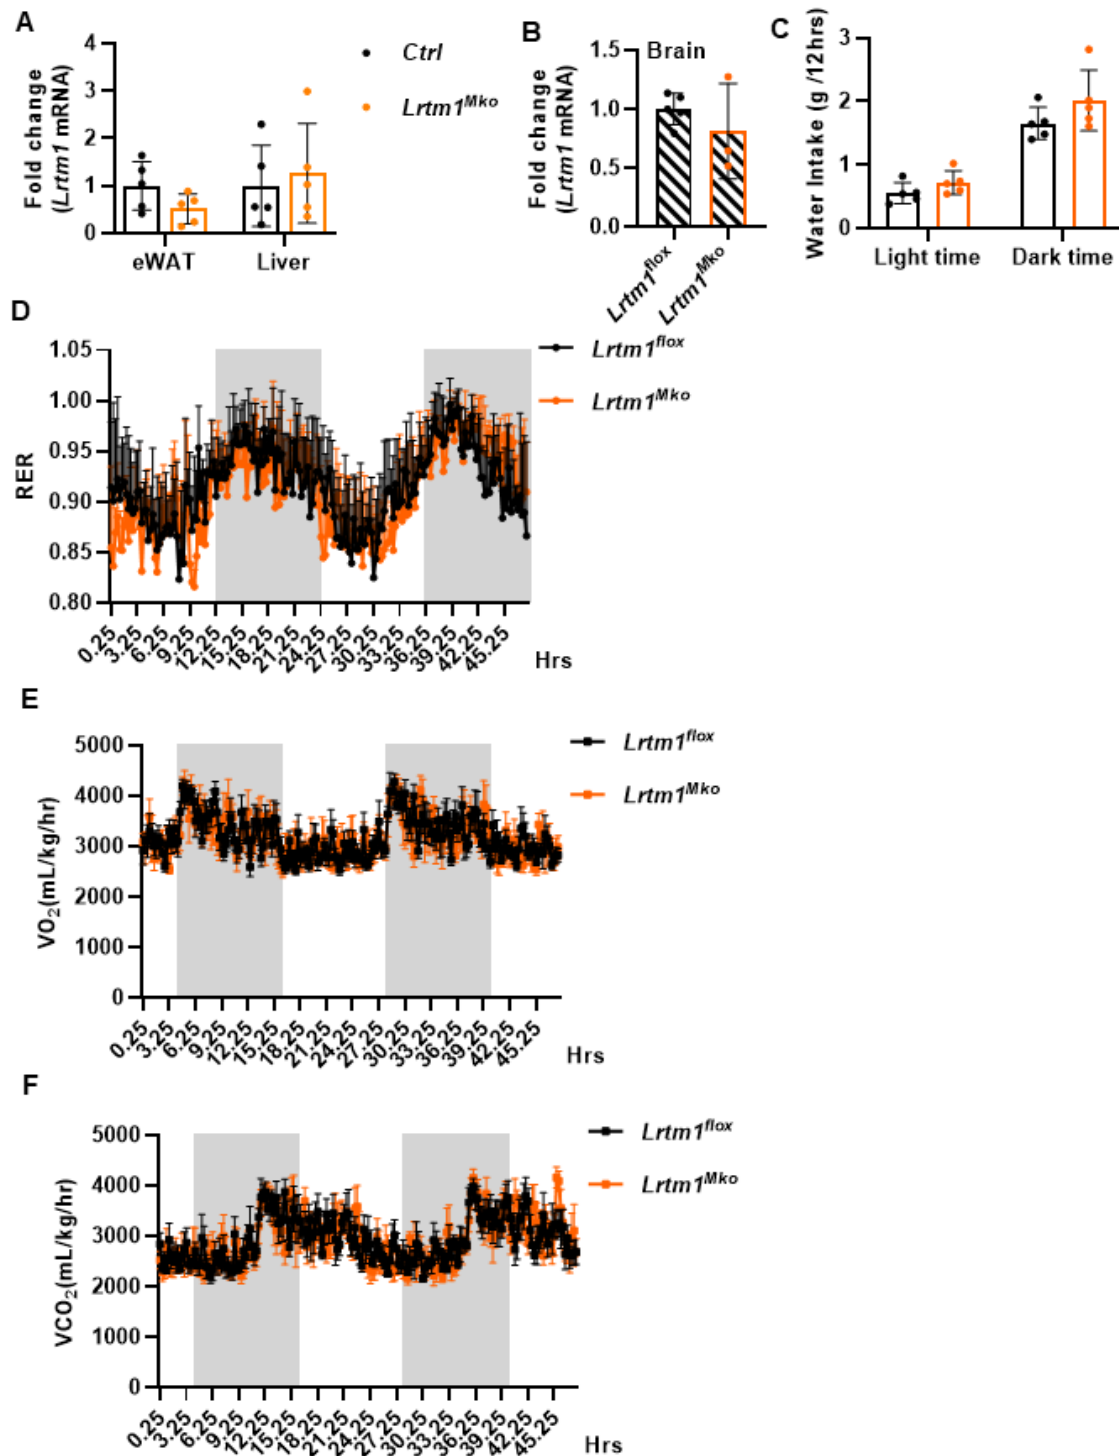

**A:** q-PCR analysis of *Lrtm1* in eWAT and liver from 4-month-old control and *Lrtm1*<sup>Mko</sup> male mice. **B:** q-PCR analysis of *Lrtm1* in Brain from 2-6 month old control and *Lrtm1*<sup>Mko</sup> female mice. **C:** The water intake, **D:** respiratory exchange ratio, **E:** O<sub>2</sub> consumption raw data, and **F:** CO<sub>2</sub> production raw data in 5-month-old control and *Lrtm1*<sup>Mko</sup> male mice on chow diet monitored by metabolic cages, (n = 5). Data represent mean ± SD.

**Fig. S8 *Lrtm1* muscle specific knockout mildly improves insulin sensitivity in female mice**

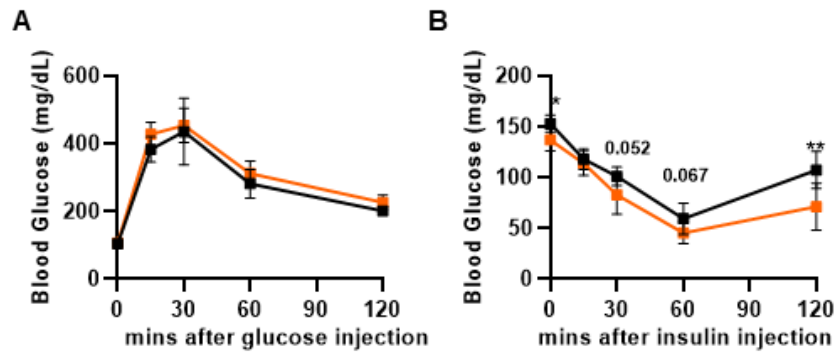

A: Glucose tolerance tests in 4-month-old control and *Lrtm1*<sup>Mko</sup> female mice on chow diet, ( $n = 6-8$ ). B: Insulin tolerance tests in 4.5-month-old control and *Lrtm1*<sup>Mko</sup> female mice on chow diet, ( $n = 6-8$ ). Data represent mean  $\pm$  SD, student  $t$  test, \* $P < 0.05$ , \*\* $P < 0.01$ .
